# Supplementary material for: Theoretical evidence of the observed kinetic order dependence on temperature during the N2O decomposition over Fe-ZSM-5
Source: Royal Society of Chemistry journal article supplement (doi:10.1039/b918954h), 2010-01-01

# Theoretical evidence of the observed kinetic order dependence on temperature during the N<sub>2</sub>O decomposition over Fe-ZSM-5

Hazar Guesmi,<sup>\*a,†</sup> Dorothee. Berthomieu,<sup>\*a</sup> Bryan Bromley,<sup>b</sup> Bernard Coq<sup>a</sup> and Lioubov Kiwi-Minsker<sup>\*b</sup>

a: MACS, Institut Charles Gerhardt, UMR 5253 CNRS/ENSCM/UM2/UM1, Ecole Nationale Supérieure de Chimie de Montpellier, France  
emails: [hazar.guesmi@upmc.fr](mailto:hazar.guesmi@upmc.fr); [dorothee.berthomieu@enscm.fr](mailto:dorothee.berthomieu@enscm.fr) †present address: Laboratoire de Réactivité de Surface, UMR 7197  
Université Pierre et Marie Curie, 4 place Jussieu, 75252 Paris, France

b: Ecole Polytechnique Fédérale de Lausanne, GGRC-ISIC-EPFL, Station 6, CH-1015, Lausanne, Switzerland email [lioubov.kiwi-minsker@epfl.ch](mailto:lioubov.kiwi-minsker@epfl.ch)

## Supplementary Information

### Experimental determination of the reaction order.

To determine the reaction order in respect to N<sub>2</sub>O, the N<sub>2</sub>O decomposition was studied varying concentrations of N<sub>2</sub>O (2.0, 1.3, 1.0 and 0.75 %) at the total gas flow rate constant. Finally, the concentration was adjusted again to 2.0% to check the reproducibility of the experiment and the catalyst stability. The result for 573 K is presented in Figure S1 showing little influence of N<sub>2</sub>O concentration on the rate. The amount of catalyst has been adjusted to obtain a conversion < 15% allowing to consider the reactor as differential.

$$r = \frac{-dC_{N_2O}}{dt} \cong \frac{C_{N_2O,in} - C_{N_2O,out}}{\tau} \quad (\text{eq. S1})$$

$$r = kC_{N_2O}^n \quad (\text{eq. S2})$$

$$C_{N_2O,in} - C_{N_2O,out} = k\tau \cdot C_{N_2O}^n \quad (\text{eq. S3})$$

$$\ln(C_{N_2O,in} - C_{N_2O,out}) = \ln(k\tau) + n \ln(C_{N_2O}) \quad (\text{eq. S4})$$

Reaction order has been determined using (eq. S1) by a linear fitting of  $\ln(C_{N_2O,in} - C_{N_2O,out})$  as function of  $\ln(C_{N_2O})$  [mol.s<sup>-1</sup>].

## SI Figure captions

Figure S1:  $\text{N}_2\text{O}$ ,  $\text{N}_2$ ,  $\text{O}_2$  and Ar inlet and outlet concentrations monitored during the  $\text{N}_2\text{O}$  decomposition over  $\text{HZSM-5}_{1200\text{Fe};40\text{Si}/\text{Al}}$  catalyst at 573 K under steady state conditions

Figure S2: Rate of  $\text{N}_2\text{O}$  decomposition as a function of  $\text{N}_2\text{O}$  concentration at 573 K on  $\text{HZSM-5}_{1200\text{Fe};40\text{Si}/\text{Al}}$

Figure S1

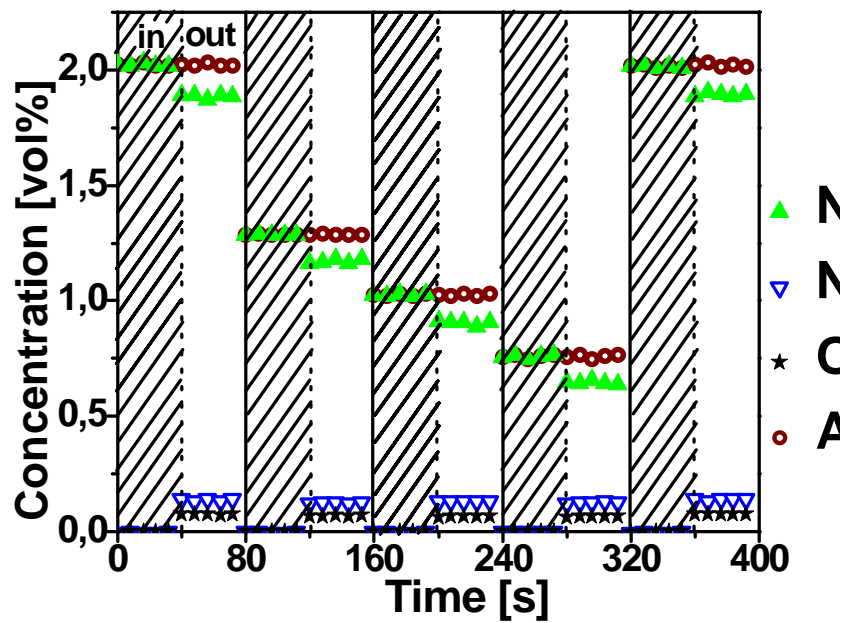

Figure S2

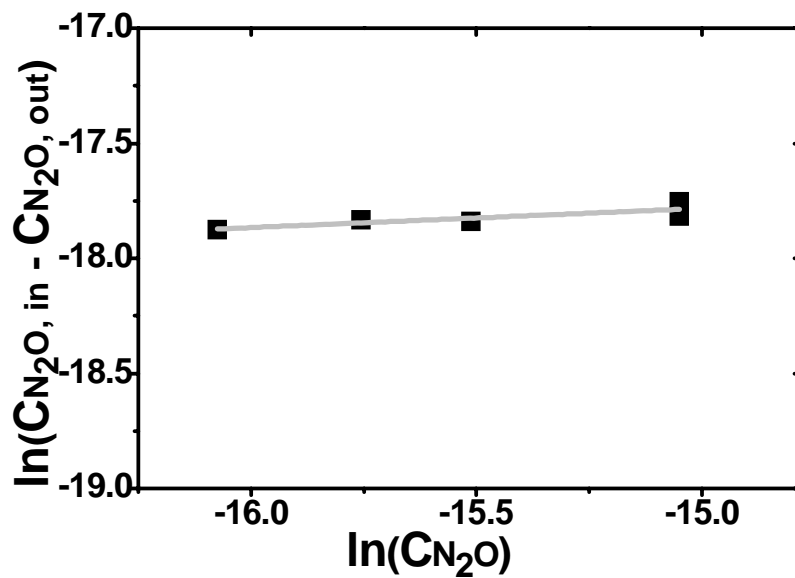

Supplement: b918954h.pdf [file b918954h.pdf]
